# Supplementary material for: Bacterial defenses against a natural antibiotic promote collateral resilience to clinical antibiotics
Source: PLoS Biol. 2021 Mar 10;19(3):e3001093. doi: 10.1371/journal.pbio.3001093 (PMC7946323; doi:10.1371/journal.pbio.3001093)
Supplement: S7 Table — MICs were determined in a microbroth dilution assay according to standard clinical methods (see Methods). Where a range of values is presented, this indicates that the observed MIC sometimes varied depending on the initial cell density of the inoculum, even within the clinically acceptable range of 3–7 × 105 CFUs/mL. CFU, colony-forming unit; CIP, ciprofloxacin; MIC, minimum inhibitory concentration. (XLSX) [file pbio.3001093.s016.xlsx]

## Sheet: Sheet1
S7 Table. Ciprofloxacin MICs for fluctuation test isolates and parent strains.
MICs were determined in a microbroth dilution assay according to standard clinical methods (see Methods).
Where a range of values is presented, this indicates that the observed MIC sometimes varied depending on the initial cell density of the inoculum, even within the clinically-acceptable range of 3-7x105 CFUs/mL.
Strain	MIC (µg/mL) without PYO	MIC (µg/mL) with 100 µM PYO
P. aeruginosa PA14 WT	0.25	0.25
P. aeruginosa PA14 ∆phz	0.125-0.25	0.25
P. aeruginosa CipR-11	2	2
P. aeruginosa CipR-13	4	4
P. aeruginosa CipR-21	0.5	0.5
P. aeruginosa CipR-25	4	4
P. aeruginosa CipR-26	4	4
P. aeruginosa CipR-33	2	2
P. aeruginosa CipR-40	0.5	0.5
B. multivorans 1 WT	0.5	4
B. multivorans 1 CipR-1	0.5	4
B. multivorans 1 CipR-2	1	4
B. multivorans 1 CipR-7	4	32
